# Supplementary material for: Highly efficient and ultrastable visible-light photocatalytic water splitting over ReS2
Source: Royal Society of Chemistry journal article supplement (doi:10.1039/c6cp01007e), 2016-01-01
Supplement: c6cp01007e1.pdf [file c6cp01007e1.pdf]

## Supplementary Information for High Efficient and Ultrastable Visible-light Photocatalytic Water Splitting over ReS<sub>2</sub>

uimei Liu<sup>1\*</sup>, Bo Xu<sup>2\*</sup>, J. -M. Liu<sup>1</sup>, Jiang Yin<sup>2</sup>, Feng Miao<sup>1</sup>, Chun-Gang Duan<sup>3</sup> and  
Xiangang Wan<sup>1</sup>

<sup>1</sup>National Laboratory of Solid State Microstructures, School of Physics, Collaborative  
Innovation Center of Advanced Microstructures, Nanjing University, Nanjing 210093,  
China

<sup>2</sup>National Laboratory of Solid State Microstructures, Department of Materials  
Science and Engineering, Collaborative Innovation Center of Advanced  
Microstructures, Nanjing University, Nanjing, 210093, China

<sup>3</sup>Key Laboratory of Polar Materials and Devices, Ministry of Education, East China  
Normal University, Shanghai 200062, China

The band structures and density of states of 2-, 3-, 4-, 5-layer ReS<sub>2</sub>.

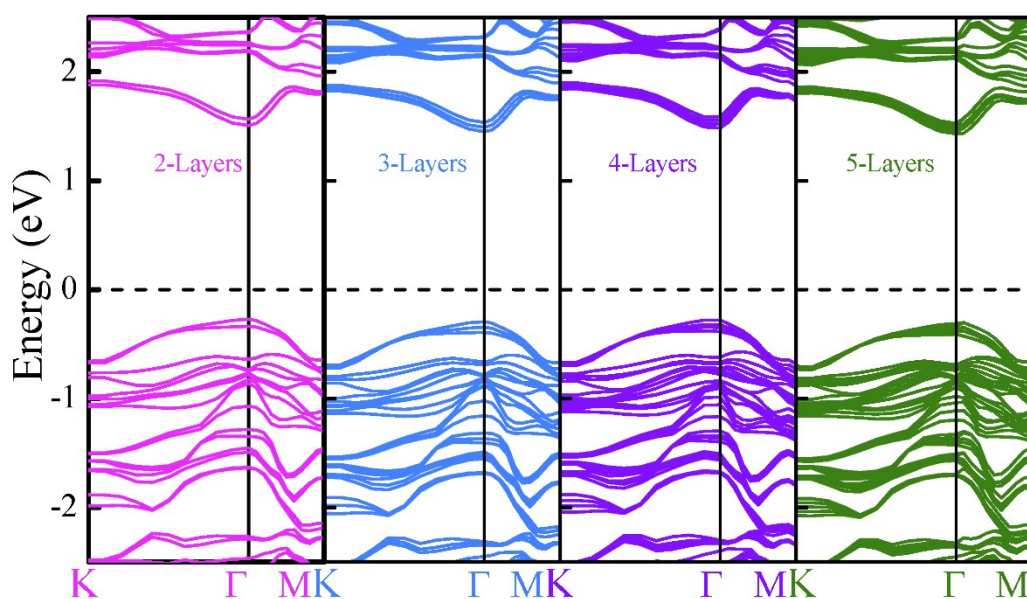

Figure. S1 Band structures of 2-, 3-, 4-, 5- layer ReS<sub>2</sub>. The Fermi energy is positioned as zero.

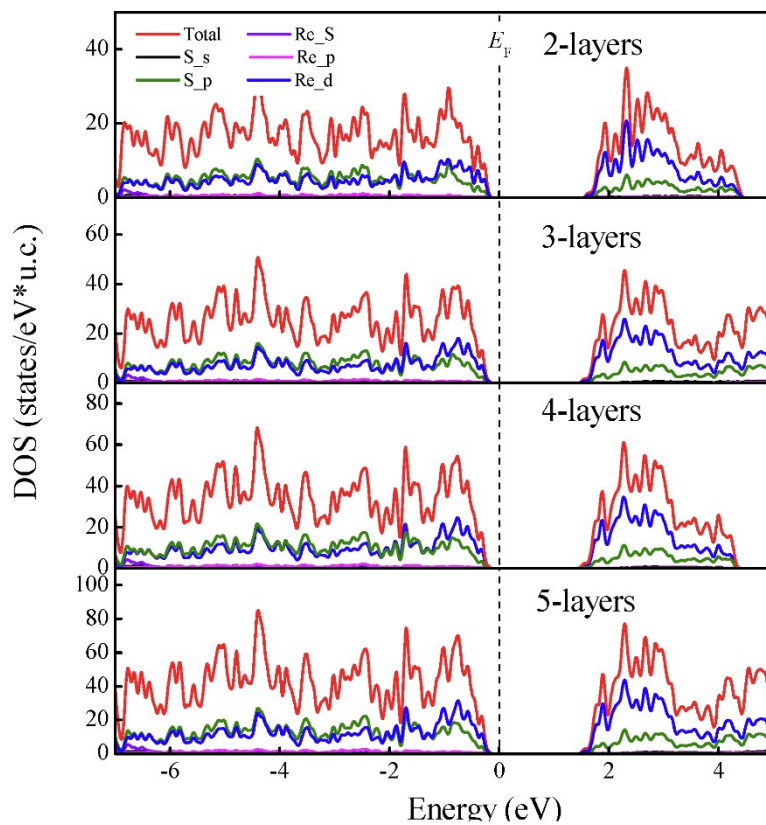

Figure. S2 Density of states of 2-, 3-, 4-, 5- layer ReS<sub>2</sub>. The Fermi energy is positioned as zero.
